# Supplementary material
Source: Research Square preprint supplement (doi:10.21203/rs.3.rs-10216164/v1)
Supplement: Supplementary file 1 [file 2651257a27194d3b36fe901d.docx]

# Supplementary Materials

| **Supplementary Table S1** | | |  |  |  |  |  |
| --- | --- | --- | --- | --- | --- | --- | --- |
| *Bonferroni-Corrected Post Hoc Comparisons of d′ Across N-back Levels* | | | | | | | |
|  |  |  |  |  |  |  |  |
|  | | |  |  |  |  |  |
| **Comparison** |  |  | **Mean Difference** | **SE** | **df** | **t** | **p Bonferroni** |
| 1-back | vs | 2-back | 0.52 | 0.08 | 61 | 6.45 | < .001 |
|  |  | 3-back | 1.34 | 0.11 | 61 | 11.43 | < .001 |
|  | vs | 4-back | 2.1 | 0.09 | 61 | 22.68 | < .001 |
| 2-back | vs | 3-back | 0.82 | 0.11 | 61 | 6.99 | < .001 |
|  |  | 4-back | 1.57 | 0.09 | 61 | 16.99 | < .001 |
| 3-back | vs | 4-back | 0.75 | 0.10 | 61 | 7.16 | < .001 |

| **Supplementary Table S2** | | |  | |  | |  | |  | |  |  |
| --- | --- | --- | --- | --- | --- | --- | --- | --- | --- | --- | --- | --- |
| *Random Effect components of the primary model (M1) and the covariate adjusted model (M2)* | | | | | | | | | | | | |
|  |
|  |  | | M1 | | | | | | M2 | | | |  |
| Group | Component | | Variance | | SD | | ICC | | Variance | | SD | ICC |  |
| Subject | Intercept | | 0.044 | | 0.21 | | 0.57 | | 0.044 | | 0.21 | 0.571 |  |
|  | 2 back vs 3 back | | 0.009 | | 0.028 | |  | | 0.01 | | 0.1 |  |  |
|  | 3 back vs 4 back | | 0.033 | | 0.182 | |  | | 0.033 | | 0.182 |  |  |
| Residual |  | | 0.033 | | 0.182 | |  | | 0.033 | | 0.182 |  |  |
|  |  | |  | |  | |  | |  | |  |  |  |
|  |  | |  | |  | |  | |  | |  |  |  |
| **Supplementary Table S3** | | | |  | |  | |  | |
| *Fixed Effects Omnibus Tests of LMM with random delay slope included* | | | | | | | | | |
|  | |  | |  | |  | |  | |
| Effect | | F | | df | | df (res) | | p | |
| effort | | 193.72 | | 2 | | 915 | | < .001 | |
| delay | | 31.10 | | 5 | | 315 | | < .001 | |
| effort * delay | | 2.77 | | 10 | | 915 | | 0.002 | |
|  | |  | |  | |  | |  | |

| **Supplementary Table S4** | |  |  |  |
| --- | --- | --- | --- | --- |
| *Random Variance Components of LMM including random slopes for delay* | | | | |
|  |  |  |  |  |
| Group | Component | Variance | SD | ICC |
| subject | Intercept | 0.044 | 0.210 | 0.570 |
|  | 1 day vs 7 days | 0.016 | 0.127 |  |
|  | 7 days vs 14 days | 0.018 | 0.135 |  |
|  | 14 days vs 30 days | 0.029 | 0.172 |  |
|  | 30 days vs 90 days | 0.028 | 0.169 |  |
|  | 90 days vs 180 days | 0.036 | 0.192 |  |
| Residual |  | 0.033 | 0.183 |  |
|  |  |  |  |  |
| Note. Random variances cannot be computed. Some variance components equal zero. | | | | |

It is noteworthy in the above tables (Table S3 and S4) that when random slopes for delay alongside random intercept was included in the Linear Mixed Model, to account for baseline individual differences in delay sensitivity. The outcome is consistent with M1 reported in the study, where the interaction effect between delay and effort is significant at 0.01 level and increasing variance across delay contrast indicating that longer delays exhibit greates between-group variability in delay sensitivity. This exactly mirrors the patten we found for the effort slopes as well in M1. However, as discussed in the main paper we could not report this model due to singular fit warnings and model convergence issues due to its complex parameterization. Despite these warnings, Delay x Effort interaction finding confirms that the proposed effect is robust to random effects misspecification and not an artifact of the chosen random effects structure.

**Supplemetary Fig. S1a**

*Group level AUC of Effort*


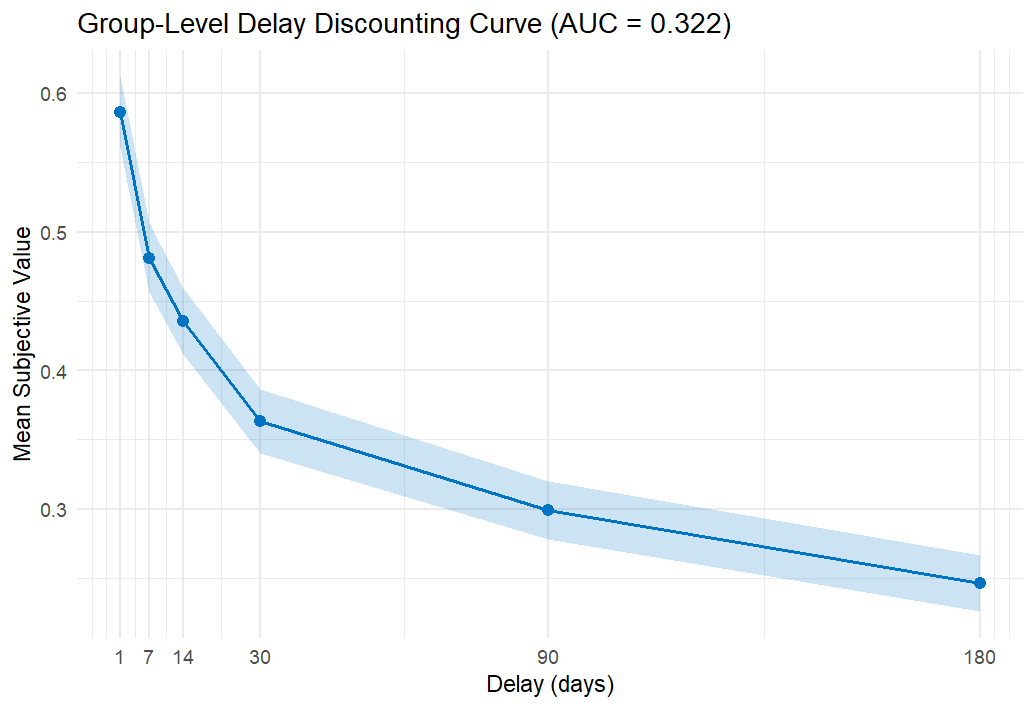


**Supplementary Fig. S1b**

*Group level AUC of Delay*

**
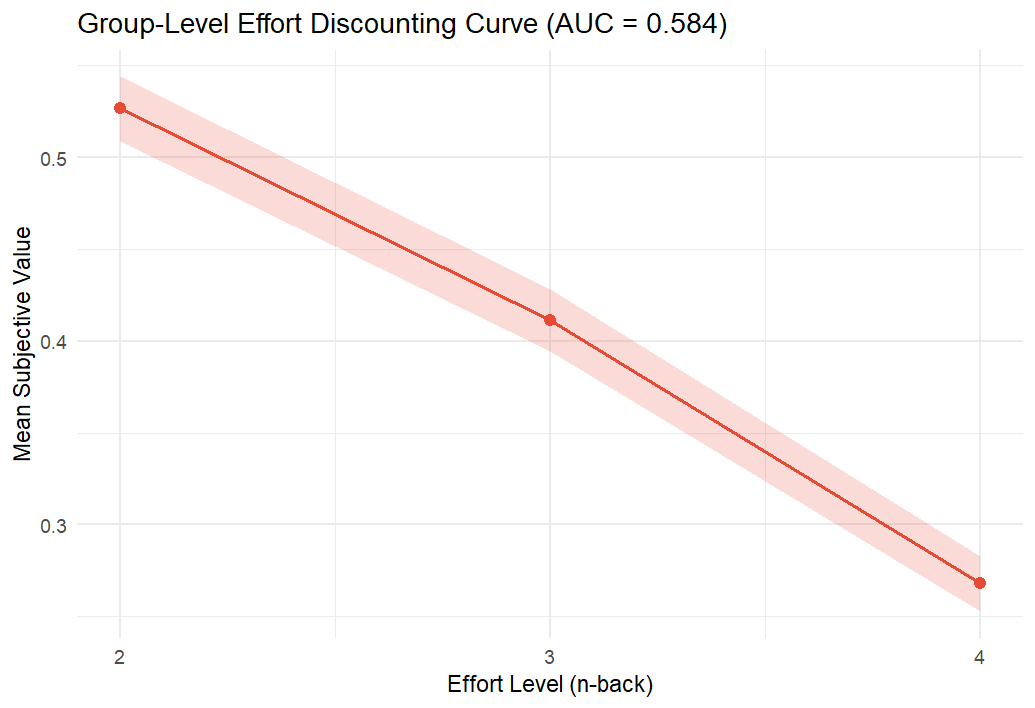
**

**Supplementary Fig. S2**

*Simulated Power Estimates at current sample size (62) along with sample sizes (N= 75 and N=90)*

**
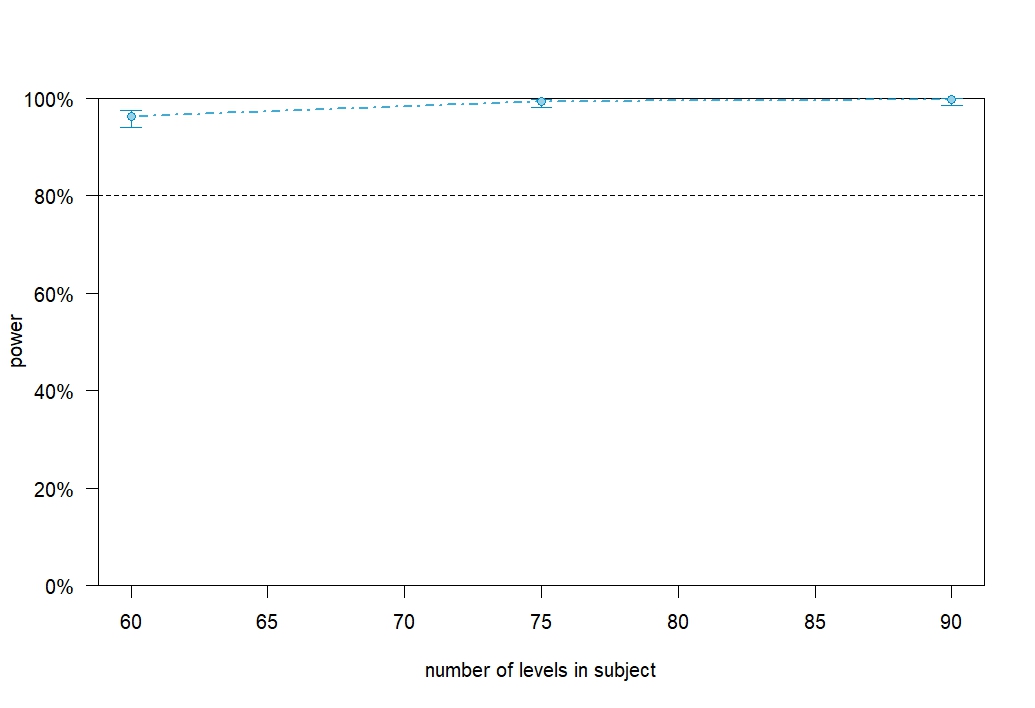
**
